# Supplementary material for: Effect of Varied Nitrogen Sources and Type of Cultivation on the Yield and Physicochemical Parameters of Flowering Chinese Cabbage (Brassica campestris L. ssp. chinensis var. utilis Tsen et Lee)
Source: MDPI journal article supplement (doi:10.3390/app13095691), 2023-05-05
Supplement: s1 [file s1]

**Table S1.** Two-way ANOVA of yielding and the chemical composition of flowering Chinese cabbage grown under various N nutrition sources and intensity

|                        | Yielding |          | N      |          | P      |         | K     |          |
|------------------------|----------|----------|--------|----------|--------|---------|-------|----------|
|                        | F        | p        | F      | p        | F      | p       | F     | p        |
| <b>Pot cultivation</b> |          |          |        |          |        |         |       |          |
| Fertilizer             | 7.98     | 0.000008 | 11.12  | 0.00001  | 5.54   | 0.00183 | 6.03  | 0.00109  |
| N level                | 160.74   | 0.000000 | 130.83 | 0.00000  | 2.96   | 0.06711 | 9.45  | 0.00066  |
| Interaction            | 3.13     | 0.002840 | 1.18   | 0.34320  | 4.83   | 0.00068 | 4.54  | 0.00106  |
| <b>Hydroponic</b>      |          |          |        |          |        |         |       |          |
| Fertilizer             | 1.75     | 0.16375  | 20.59  | 0.000001 | 149.62 | 0.00000 | 15.84 | 0.000007 |
| N level                | 35.32    | 0.00000  | 0.33   | 0.723039 | 2.12   | 0.14201 | 3.19  | 0.058969 |
| Interaction            | 3.55     | 0.00348  | 4.89*  | 0.002138 | 5.47   | 0.00109 | 11.30 | 0.000005 |

  

|                        | Ca     |         | Mg     |         | Na      |        |
|------------------------|--------|---------|--------|---------|---------|--------|
|                        | F      | p       | F      | p       | F       | p      |
| <b>Pot cultivation</b> |        |         |        |         |         |        |
| Fertilizer             | 25.32  | 0.00000 | 100.79 | 0.00000 | 806.795 | 0.00   |
| N level                | 22.54  | 0.00000 | 31.53  | 0.00000 | 317.317 | 0.00   |
| Interaction            | 30.97  | 0.00000 | 8.77   | 0.00000 | 155.918 | 0.00   |
| <b>Hydroponic</b>      |        |         |        |         |         |        |
| Fertilizer             | 179.19 | 0.00000 | 338.52 | 0.00000 | 521.12  | 0.0000 |
| N level                | 0.59   | 0.56013 | 1.15   | 0.33359 | 19.33   | 0.0000 |
| Interaction            | 29.60  | 0.00000 | 66.81  | 0.00000 | 11.92   | 0.0000 |

  

|                        | Fe    |         | Mn    |         | Zn    |         | Cu    |         |
|------------------------|-------|---------|-------|---------|-------|---------|-------|---------|
|                        | F     | p       | F     | p       | F     | p       | F     | p       |
| <b>Pot cultivation</b> |       |         |       |         |       |         |       |         |
| Fertilizer             | 14.16 | 0.00000 | 1.93  | 0.13096 | 14.42 | 0.00000 | 56.81 | 0.00000 |
| N level                | 34.87 | 0.00000 | 33.02 | 0.00000 | 0.94  | 0.40204 | 1.37  | 0.26967 |
| Interaction            | 6.12  | 0.00011 | 4.98  | 0.00055 | 3.02  | 0.01304 | 19.84 | 0.00000 |
| <b>Hydroponic</b>      |       |         |       |         |       |         |       |         |
| Fertilizer             | 8.37  | 0.00055 | 4.99  | 0.00786 | 92.46 | 0.00000 | 44.46 | 0.0000  |
| N level                | 5.75  | 0.00913 | 1.68  | 0.20717 | 7.80  | 0.00245 | 5.61  | 0.0100  |
| Interaction            | 14.49 | 0.00000 | 14.55 | 0.00000 | 18.17 | 0.00000 | 8.67  | 0.0000  |

|                        | Chl a |          | Chl b |          | (x+c)  |          | Chl a+ Chl b |          |
|------------------------|-------|----------|-------|----------|--------|----------|--------------|----------|
|                        | F     | <i>p</i> | F     | <i>p</i> | F      | <i>p</i> | F            | <i>p</i> |
| <b>Pot cultivation</b> |       |          |       |          |        |          |              |          |
| Fertilizer             | 1.12  | 0.38493  | 2.50  | 0.08673  | 4.32   | 0.01600  | 1.06         | 0.41123  |
| N level                | 15.84 | 0.00020  | 4.97  | 0.02204  | 25.19  | 0.00002  | 12.98        | 0.00054  |
| Interaction            | 7.23  | 0.00055  | 2.53  | 0.05753  | 14.03  | 0.00001  | 5.98         | 0.00151  |
| <b>Hydroponic</b>      |       |          |       |          |        |          |              |          |
| Fertilizer             | 71.27 | 0.00000  | 52.64 | 0.00000  | 180.31 | 0.00000  | 61.10        | 0.00000  |
| N level                | 48.04 | 0.00000  | 8.48  | 0.00507  | 220.63 | 0.00000  | 31.92        | 0.00002  |
| Interaction            | 62.28 | 0.00000  | 12.75 | 0.00014  | 159.35 | 0.00000  | 44.98        | 0.00000  |

|                        | Chl a/Chl b |          | (Chl a/Chl b)/(x+c) |          | L*       |          | a*    |          |
|------------------------|-------------|----------|---------------------|----------|----------|----------|-------|----------|
|                        | F           | <i>p</i> | F                   | <i>p</i> | F        | <i>p</i> | F     | <i>p</i> |
| <b>Pot cultivation</b> |             |          |                     |          |          |          |       |          |
| Fertilizer             | 4.35        | 0.01566  | 11.99               | 0.00014  | 3.56E+05 | 0.00     | 61918 | 0.00     |
| N level                | 2.05        | 0.16285  | 0.67                | 0.52577  | 6.67E+03 | 0.00     | 5912  | 0.00     |
| Interaction            | 1.28        | 0.32179  | 3.69                | 0.01418  | 2.65E+05 | 0.00     | 9709  | 0.00     |
| <b>Hydroponic</b>      |             |          |                     |          |          |          |       |          |
| Fertilizer             | 76.65       | 0.00000  | 161.00              | 0.000000 | 4.54E+05 | 0.00     | 21674 | 0.00     |
| N level                | 48.64       | 0.00000  | 78.41               | 0.000000 | 5.87E+05 | 0.00     | 1716  | 0.00     |
| Interaction            | 26.87       | 0.00000  | 9.62                | 0.000530 | 8.46E+05 | 0.00     | 10656 | 0.00     |

|                        | b*    |          | h     |          | C*    |          | DPPH  |          |
|------------------------|-------|----------|-------|----------|-------|----------|-------|----------|
|                        | F     | <i>p</i> | F     | <i>p</i> | F     | <i>p</i> | F     | <i>p</i> |
| <b>Pot cultivation</b> |       |          |       |          |       |          |       |          |
| Fertilizer             | 4717  | 0.00     | 57761 | 0.00     | 9222  | 0.00     | 63.73 | 0.00000  |
| N level                | 1422  | 0.00     | 3973  | 0.00     | 2587  | 0.00     | 90.97 | 0.00000  |
| Interaction            | 13179 | 0.00     | 6197  | 0.00     | 14962 | 0.00     | 12.59 | 0.00002  |
| <b>Hydroponic</b>      |       |          |       |          |       |          |       |          |
| Fertilizer             | 21946 | 0.00     | 35968 | 0.00     | 17033 | 0.00     | 45.69 | 0.00000  |
| N level                | 51212 | 0.00     | 3357  | 0.00     | 53752 | 0.00     | 10.19 | 0.00260  |
| Interaction            | 14834 | 0.00     | 13854 | 0.00     | 14569 | 0.00     | 33.05 | 0.00000  |

|                        | TEAC   |          | FRAP   |          | TPC    |          | TFC   |          |
|------------------------|--------|----------|--------|----------|--------|----------|-------|----------|
|                        | F      | <i>p</i> | F      | <i>p</i> | F      | <i>p</i> | F     | <i>p</i> |
| <b>Pot cultivation</b> |        |          |        |          |        |          |       |          |
| Fertilizer             | 188.94 | 0.00000  | 145.21 | 0.00000  | 37.12  | 0.00000  | 26.99 | 0.00000  |
| N level                | 19.97  | 0.00006  | 68.73  | 0.00000  | 3.96   | 0.04161  | 11.11 | 0.00110  |
| Interaction            | 37.17  | 0.00000  | 51.54  | 0.00000  | 14.92  | 0.000010 | 9.61  | 0.00011  |
| <b>Hydroponic</b>      |        |          |        |          |        |          |       |          |
| Fertilizer             | 4.84   | 0.01962  | 51.98  | 0.00000  | 74.45  | 0.00000  | 54.23 | 0.00000  |
| N level                | 51.91  | 0.00000  | 12.41  | 0.00120  | 41.46  | 0.00000  | 50.94 | 0.00000  |
| Interaction            | 55.78  | 0.00000  | 52.37  | 0.00000  | 110.88 | 0.00000  | 13.16 | 0.00012  |

**Table S2.** Colour coordinates of flowering Chinese cabbage cultivated under various N nutrition sources.

|                        | N source                                 | N level | L*                       | a*                      | b*                      | h                         | C                       |
|------------------------|------------------------------------------|---------|--------------------------|-------------------------|-------------------------|---------------------------|-------------------------|
| Pot cultivation        | NH <sub>4</sub> NO <sub>3</sub>          | N-50    | 44.46±0.01 <sup>m*</sup> | -8.33±0.02 <sup>m</sup> | 20.92±0.01 <sup>g</sup> | 111.72±0.04 <sup>b</sup>  | 22.51±0.01 <sup>e</sup> |
|                        |                                          | N-70    | 46.15±0.00 <sup>d</sup>  | -8.21±0.00 <sup>l</sup> | 21.41±0.02 <sup>d</sup> | 110.98±0.02 <sup>e</sup>  | 22.93±0.01 <sup>c</sup> |
|                        |                                          | N-90    | 44.52±0.01 <sup>l</sup>  | -7.42±0.02 <sup>f</sup> | 19.08±0.02 <sup>n</sup> | 111.26±0.04 <sup>c</sup>  | 20.47±0.02 <sup>n</sup> |
|                        | Ca(NO <sub>3</sub> ) <sub>2</sub>        | N-50    | 44.90±0.01 <sup>i</sup>  | -7.83±0.01 <sup>i</sup> | 21.03±0.01 <sup>f</sup> | 110.42±0.03 <sup>f</sup>  | 22.44±0.01 <sup>f</sup> |
|                        |                                          | N-70    | 41.58±0.00 <sup>o</sup>  | -7.49±0.01 <sup>g</sup> | 19.34±0.03 <sup>l</sup> | 111.18±0.02 <sup>d</sup>  | 20.74±0.03 <sup>m</sup> |
|                        |                                          | N-90    | 44.76±0.00 <sup>j</sup>  | -6.85±0.01 <sup>e</sup> | 21.51±0.03 <sup>b</sup> | 107.67±0.05 <sup>h</sup>  | 22.57±0.03 <sup>d</sup> |
|                        | Mg(NO <sub>3</sub> ) <sub>2</sub>        | N-50    | 43.58±0.01 <sup>n</sup>  | -6.71±0.01 <sup>d</sup> | 20.22±0.02 <sup>j</sup> | 108.34±0.03 <sup>g</sup>  | 21.31±0.02 <sup>l</sup> |
|                        |                                          | N-70    | 45.02±0.00 <sup>h</sup>  | -8.72±0.00 <sup>o</sup> | 21.88±0.02 <sup>a</sup> | 111.73±0.01 <sup>b</sup>  | 23.55±0.01 <sup>a</sup> |
|                        |                                          | N-90    | 46.02±0.00 <sup>e</sup>  | -8.61±0.01 <sup>n</sup> | 21.47±0.01 <sup>c</sup> | 111.86±0.01 <sup>a</sup>  | 23.14±0.01 <sup>b</sup> |
|                        | NaNO <sub>3</sub>                        | N-50    | 45.05±0.01 <sup>g</sup>  | -7.99±0.01 <sup>j</sup> | 20.58±0.02 <sup>i</sup> | 111.23±0.01 <sup>cd</sup> | 22.08±0.02 <sup>g</sup> |
|                        |                                          | N-70    | 46.88±0.01 <sup>c</sup>  | -7.80±0.01 <sup>h</sup> | 20.04±0.01 <sup>k</sup> | 111.26±0.02 <sup>c</sup>  | 21.51±0.01 <sup>k</sup> |
|                        |                                          | N-90    | 45.88±0.01 <sup>f</sup>  | -8.05±0.01 <sup>k</sup> | 20.04±0.01 <sup>k</sup> | 111.90±0.03 <sup>a</sup>  | 21.59±0.01 <sup>j</sup> |
|                        | Urea<br>CH <sub>4</sub> N <sub>2</sub> O | N-50    | 47.65±0.00 <sup>a</sup>  | -5.37±0.02 <sup>a</sup> | 19.29±0.01 <sup>m</sup> | 105.55±0.03 <sup>j</sup>  | 20.02±0.01 <sup>o</sup> |
|                        |                                          | N-70    | 46.99±0.01 <sup>b</sup>  | -6.18±0.02 <sup>c</sup> | 20.80±0.01 <sup>h</sup> | 106.55±0.05 <sup>i</sup>  | 21.70±0.01 <sup>i</sup> |
|                        |                                          | N-90    | 44.54±0.00 <sup>k</sup>  | -5.82±0.01 <sup>b</sup> | 21.19±0.01 <sup>e</sup> | 105.36±0.03 <sup>k</sup>  | 21.97±0.01 <sup>h</sup> |
|                        |                                          | Mean    | 45.20±1.47               | -7.43±1.00              | 20.59±0.86              | 109.8±2.35                | 21.90±0.98              |
| Hydroponic cultivation | NH <sub>4</sub> NO <sub>3</sub>          | N-50    | 45.87±0.01 <sup>i</sup>  | -7.48±0.00 <sup>f</sup> | 19.91±0.01 <sup>i</sup> | 110.58±0.02 <sup>f</sup>  | 21.27±0.01 <sup>h</sup> |
|                        |                                          | N-70    | 45.07±0.00 <sup>j</sup>  | -8.02±0.01 <sup>h</sup> | 19.02±0.02 <sup>k</sup> | 112.86±0.04 <sup>a</sup>  | 20.64±0.01 <sup>j</sup> |
|                        |                                          | N-90    | 46.84±0.00 <sup>h</sup>  | -8.54±0.01 <sup>k</sup> | 20.45±0.01 <sup>g</sup> | 112.67±0.03 <sup>b</sup>  | 22.17±0.01 <sup>e</sup> |
|                        | Ca(NO <sub>3</sub> ) <sub>2</sub>        | N-50    | 48.77±0.01 <sup>e</sup>  | -7.79±0.01 <sup>g</sup> | 20.55±0.02 <sup>f</sup> | 110.77±0.03 <sup>e</sup>  | 21.97±0.01 <sup>f</sup> |
|                        |                                          | N-70    | 50.08±0.00 <sup>c</sup>  | -6.98±0.02 <sup>d</sup> | 22.32±0.02 <sup>b</sup> | 107.35±0.02 <sup>i</sup>  | 23.39±0.02 <sup>a</sup> |
|                        |                                          | N-90    | 47.76±0.01 <sup>g</sup>  | -8.35±0.02 <sup>j</sup> | 21.81±0.03 <sup>e</sup> | 110.96±0.05 <sup>d</sup>  | 23.35±0.02 <sup>b</sup> |
|                        | Mg(NO <sub>3</sub> ) <sub>2</sub>        | N-50    | 48.28±0.01 <sup>f</sup>  | -8.04±0.02 <sup>i</sup> | 19.73±0.01 <sup>j</sup> | 112.18±0.03 <sup>c</sup>  | 21.31±0.01 <sup>g</sup> |
|                        |                                          | N-70    | 45.02±0.00 <sup>k</sup>  | -7.00±0.01 <sup>d</sup> | 19.99±0.01 <sup>h</sup> | 109.29±0.02 <sup>g</sup>  | 21.18±0.01 <sup>i</sup> |
|                        |                                          | N-90    | 50.77±0.01 <sup>a</sup>  | -6.81±0.01 <sup>c</sup> | 22.37±0.02 <sup>a</sup> | 106.93±0.03 <sup>j</sup>  | 23.38±0.02 <sup>a</sup> |
|                        | NaNO <sub>3</sub>                        | N-50    | 42.10±0.01 <sup>l</sup>  | -5.87±0.03 <sup>a</sup> | 18.81±0.02 <sup>l</sup> | 107.33±0.04 <sup>i</sup>  | 19.71±0.03 <sup>k</sup> |
|                        |                                          | N-70    | 50.67±0.01 <sup>a</sup>  | -7.35±0.01 <sup>e</sup> | 22.14±0.02 <sup>d</sup> | 108.37±0.03 <sup>h</sup>  | 23.32±0.01 <sup>c</sup> |
|                        |                                          | N-90    | 49.38±0.00 <sup>d</sup>  | -6.58±0.00 <sup>b</sup> | 22.24±0.01 <sup>c</sup> | 106.48±0.02 <sup>k</sup>  | 23.19±0.01 <sup>d</sup> |
|                        |                                          | Mean    | 47.55±2.58               | -7.40±0.77              | 20.78±1.29              | 109.65±2.25               | 22.07±1.22              |

\* Values with the same letter within one type of cultivation for the parameter were not significantly different ( $p > 0.05$ , Duncan's test).

**Table S3.** Antioxidant activity (DPPH, TEAC(ABTS), FRAP) and phenolic content (TPC – total phenolic content and TFC – total flavonoid content) of flowering Chinese cabbage cultivated under various N nutrition sources.

|                        | N source                              | N level | DPPH<br>μmol/g             | TEAC(ABTS)<br>μmol/g       | FRAP<br>mmol TE/g         | TPC<br>mg GAE/g          | TFC<br>mg QE/g           |
|------------------------|---------------------------------------|---------|----------------------------|----------------------------|---------------------------|--------------------------|--------------------------|
| Pot cultivation        | NH <sub>4</sub> NO <sub>3</sub>       | N-50    | 69.25±1.82 <sup>h*</sup>   | 400.19±1.34 <sup>g</sup>   | 22.45±0.03 <sup>d</sup>   | 4.26±0.11 <sup>def</sup> | 1.20±0.03 <sup>cd</sup>  |
|                        |                                       | N-70    | 76.22±1.82 <sup>fgh</sup>  | 447.22±23.13 <sup>ef</sup> | 22.60±0.32 <sup>d</sup>   | 4.73±0.02 <sup>bc</sup>  | 1.25±0.01 <sup>a-d</sup> |
|                        |                                       | N-90    | 87.77±7.99 <sup>de</sup>   | 493.85±2.29 <sup>b</sup>   | 24.66±0.18 <sup>abc</sup> | 4.53±0.09 <sup>cde</sup> | 1.13±0.00 <sup>de</sup>  |
|                        | Ca(NO <sub>3</sub> ) <sub>2</sub>     | N-50    | 75.56±0.74 <sup>gh</sup>   | 408.16±3.44 <sup>g</sup>   | 21.34±0.13 <sup>ef</sup>  | 5.12±0.01 <sup>ab</sup>  | 1.19±0.02 <sup>cd</sup>  |
|                        |                                       | N-70    | 90.57±0.16 <sup>cd</sup>   | 434.11±2.29 <sup>f</sup>   | 25.05±0.27 <sup>ab</sup>  | 4.53±0.36 <sup>cde</sup> | 1.14±0.05 <sup>de</sup>  |
|                        |                                       | N-90    | 82.25±3.92 <sup>efg</sup>  | 399.38±2.48 <sup>g</sup>   | 18.27±1.22 <sup>g</sup>   | 4.11±0.31 <sup>ef</sup>  | 1.34±0.07 <sup>ab</sup>  |
|                        | Mg(NO <sub>3</sub> ) <sub>2</sub>     | N-50    | 73.81±1.2 <sup>h</sup>     | 443.57±0.76 <sup>ef</sup>  | 23.97±0.04 <sup>ac</sup>  | 4.73±0.02 <sup>bc</sup>  | 1.26±0.00 <sup>abc</sup> |
|                        |                                       | N-70    | 115.88±0.19 <sup>a</sup>   | 472.63±15.48 <sup>cd</sup> | 25.73±0.89 <sup>b</sup>   | 5.26±0.44 <sup>a</sup>   | 1.36±0.01 <sup>a</sup>   |
|                        |                                       | N-90    | 106.12±3.22 <sup>b</sup>   | 442.63±3.25 <sup>ef</sup>  | 23.71±0.23 <sup>c</sup>   | 4.47±0.07 <sup>c-f</sup> | 1.28±0.03 <sup>abc</sup> |
|                        | NaNO <sub>3</sub>                     | N-50    | 83.27±4.65 <sup>def</sup>  | 458.44±5.35 <sup>de</sup>  | 20.61±0.64 <sup>f</sup>   | 4.18±0.04 <sup>def</sup> | 1.18±0.00 <sup>cd</sup>  |
|                        |                                       | N-70    | 87.82±0.39 <sup>de</sup>   | 488.58±3.25 <sup>bc</sup>  | 21.34±0.21 <sup>ef</sup>  | 4.07±0.00 <sup>f</sup>   | 1.02±0.03 <sup>f</sup>   |
|                        |                                       | N-90    | 96.49±2.56 <sup>c</sup>    | 536.69±0.57 <sup>a</sup>   | 25.05±0.06 <sup>b</sup>   | 4.6±0.28 <sup>cd</sup>   | 1.23±0.14 <sup>bcd</sup> |
| Hydroponic cultivation | Urea CH <sub>4</sub> N <sub>2</sub> O | N-50    | 60.15±5.24 <sup>i</sup>    | 408.57±1.34 <sup>g</sup>   | 16.44±0.15 <sup>h</sup>   | 2.79±0.02 <sup>h</sup>   | 0.85±0.01 <sup>h</sup>   |
|                        |                                       | N-70    | 76.60±1.75 <sup>fgh</sup>  | 371.54±0.19 <sup>h</sup>   | 22.15±0.61 <sup>de</sup>  | 3.61±0.12 <sup>g</sup>   | 1.04±0.04 <sup>ef</sup>  |
|                        |                                       | N-90    | 75.51±1.98 <sup>fgh</sup>  | 346.13±9.75 <sup>i</sup>   | 16.06±0.18 <sup>h</sup>   | 4.34±0.00 <sup>c-f</sup> | 1.19±0.05 <sup>cd</sup>  |
|                        |                                       |         | 83.82±14.30                | 436.78±49.25               | 21.96±3.01                | 4.36±0.60                | 1.18±0.13                |
|                        | NH <sub>4</sub> NO <sub>3</sub>       | N-50    | 122.41±0.12 <sup>a</sup>   | 362.62±12.81 <sup>de</sup> | 19.71±0.33 <sup>cd</sup>  | 2.78±0.08 <sup>g</sup>   | 0.79±0.05 <sup>g</sup>   |
|                        |                                       | N-70    | 93.58±3.57 <sup>ef</sup>   | 409.51±5.35 <sup>a</sup>   | 20.35±0.04 <sup>c</sup>   | 4.05±0.02 <sup>c</sup>   | 1.13±0.01 <sup>cd</sup>  |
|                        |                                       | N-90    | 116.4±1.24 <sup>a</sup>    | 352.07±4.40 <sup>e</sup>   | 23.89±0.69 <sup>a</sup>   | 3.33±0.01 <sup>de</sup>  | 0.95±0.03 <sup>ef</sup>  |
|                        | Ca(NO <sub>3</sub> ) <sub>2</sub>     | N-50    | 100.44±1.32 <sup>b-e</sup> | 377.89±1.15 <sup>cd</sup>  | 22.14±0.60 <sup>b</sup>   | 4.02±0.18 <sup>c</sup>   | 1.29±0.03 <sup>b</sup>   |
|                        |                                       | N-70    | 103.04±2.91 <sup>bc</sup>  | 384.24±8.60 <sup>b</sup>   | 23.07±0.22 <sup>ab</sup>  | 4.01±0.08 <sup>c</sup>   | 1.30±0.06 <sup>b</sup>   |
|                        |                                       | N-90    | 95.69±3.14 <sup>def</sup>  | 396.54±7.26 <sup>ab</sup>  | 24.13±0.07 <sup>a</sup>   | 4.34±0.09 <sup>b</sup>   | 1.36±0.01 <sup>ab</sup>  |
|                        | Mg(NO <sub>3</sub> ) <sub>2</sub>     | N-50    | 106.17±1.90 <sup>b</sup>   | 394.51±2.10 <sup>ab</sup>  | 23.04±0.66 <sup>ab</sup>  | 4.61±0.01 <sup>a</sup>   | 0.95±0.01 <sup>ef</sup>  |
|                        |                                       | N-70    | 84.37±2.02 <sup>g</sup>    | 374.92±5.73 <sup>cd</sup>  | 17.34±0.81 <sup>ef</sup>  | 3.28±0.15 <sup>e</sup>   | 1.02±0.12 <sup>de</sup>  |
|                        |                                       | N-90    | 97.04±2.40 <sup>c-f</sup>  | 358.97±6.50 <sup>e</sup>   | 18.52±0.01 <sup>de</sup>  | 3.54±0.07 <sup>d</sup>   | 1.13±0.00 <sup>cd</sup>  |
| Hydroponic cultivation | NaNO <sub>3</sub>                     | N-50    | 79.59±7.45 <sup>g</sup>    | 303.01±11.09 <sup>f</sup>  | 16.21±0.08 <sup>f</sup>   | 3.01±0.13 <sup>f</sup>   | 0.86±0.01 <sup>fg</sup>  |
|                        |                                       | N-70    | 101.73±2.06 <sup>bcd</sup> | 406.14±0.96 <sup>a</sup>   | 22.85±1.24 <sup>ab</sup>  | 4.73±0.12 <sup>a</sup>   | 1.24±0.10 <sup>bc</sup>  |
|                        |                                       | N-90    | 93.23±0.04 <sup>f</sup>    | 408.57±0.96 <sup>a</sup>   | 20.10±0.28 <sup>c</sup>   | 4.76±0.12 <sup>a</sup>   | 1.43±0.03 <sup>a</sup>   |
|                        |                                       |         | 99.47±11.97                | 377.42±30.28               | 20.94±2.61                | 3.87±0.67                | 1.12±0.21                |

\* Values with the same letter within one type of cultivation for the parameter were not significantly different ( $p > 0.05$ , Duncan's test).
